# Supplementary material for: CuSCN as selective contact in solution-processed small-molecule organic solar cells leads to over 7% efficient porphyrin-based device
Source: Royal Society of Chemistry journal article supplement (doi:10.1039/c6ta04369k), 2016-01-01
Supplement: c6ta04369k1.pdf [file c6ta04369k1.pdf]

## Supporting information

### **CuSCN as Selective Contact in Solution Processed Small Molecule Organic Solar Cells Leads to over 7% Efficient Porphyrin Based Device.**

Gabriela Morán<sup>a</sup>, Susana Arrechea<sup>a</sup>, Pilar de la Cruz<sup>a</sup>, Virginia Cuesta,<sup>a</sup> S. Biswas<sup>d</sup>, Emilio Palomares<sup>b,c\*</sup>, Ganesh D. Sharma<sup>d\*</sup>, Fernando Langa<sup>a\*</sup>

<sup>a</sup>Universidad de Castilla-La Mancha. Institute of Nanoscience, Nanotechnology and Molecular Materials (INAMOL), Campus de la Fábrica de Armas, Toledo. Spain. Tel: 34 9252 68843. E-mail: [Fernando.Langa@uclm.es](mailto:Fernando.Langa@uclm.es)

<sup>b</sup>Institute of Chemical Research of Catalonia (ICIQ). Avda. Països Catalans, 14. Tarragona. E-43007. Spain. E-mail: [epalomares@ICIQ.ES](mailto:epalomares@ICIQ.ES) [epalomares@ICIQ.ES](mailto:epalomares@ICIQ.ES)

<sup>c</sup>ICREA. Passeig Lluís Companys, 23. Barcelona. E-08010. Spain.

<sup>d</sup>Department of Physics, The LNM Institute of Information Technology (Deemed University), Rupa ki Nagal, Jamdoli, Jaipur (Raj.) 302031, India

## Table of contents

|                                                                                     |              |
|-------------------------------------------------------------------------------------|--------------|
| <b>1. Experimental details</b>                                                      | <b>S1-S2</b> |
| <b>2. <sup>1</sup>H -NMR, <sup>13</sup>C-NMR, FT-IR and MALDI-TOF or MS spectra</b> | <b>S3</b>    |
| <b>3. Thermogravimetric analysis</b>                                                | <b>S14</b>   |
| <b>4. UV-Visible and emission spectroscopies</b>                                    | <b>S14</b>   |
| <b>5. Square Wave plots</b>                                                         | <b>S16</b>   |

### **Experimental details**

Synthetic procedures were performed under Argon atmosphere, in dry solvent unless otherwise noted. All reagents and solvents were reagent grade and were used without further purification. Chromatographic purifications were performed using silica gel 60 SDS (particle size 0.040-0.063 mm). Analytical thin-layer chromatography was performed using Merck TLC silica gel 60 F254. <sup>1</sup>H-NMR spectra were obtained on Bruker TopSpin AV-400 (400 MHz) spectrometer. Chemical shifts are reported in parts per million (ppm) relative to the solvent residual peak (CDCl<sub>3</sub>, 7.27 ppm). <sup>13</sup>C-NMR chemical shifts (δ) are reported relative to the solvent residual peak (CDCl<sub>3</sub>, 77.0 ppm). UV-Vis measurements were carried out on a Shimadzu UV 3600 spectrophotometer. For extinction coefficient determination, solutions of different concentration were prepared in CH<sub>2</sub>Cl<sub>2</sub>

(HPLC grade) with absorption between 0.1-1 of absorbance using a 1 cm UV cuvette. The emission measurements were carried out on Cary Eclipse fluorescence spectrophotometer. Mass spectra (MALDI-TOF) were recorded on a VOYAGER DE<sup>TM</sup> STR mass spectrometer using dithranol as matrix. Melting points are uncorrected.

Cyclic voltammetry was performed in ODCB-acetonitrile (4:1) solutions. Tetrabutylammonium perchlorate (0.1 M as supporting electrolyte) were purchased from Acros and used without purification. Solutions were deoxygenated by argon bubbling prior to each experiment, which was run under argon atmosphere. Experiments were done in a one-compartment cell equipped with a platinum working microelectrode ( $\varnothing = 2$  mm) and a platinum wire counter electrode. An Ag/AgNO<sub>3</sub> (0.01 M in CH<sub>3</sub>CN) electrode was used as reference and checked against the ferrocene/ferrocenium couple (Fc/Fc<sup>+</sup>) before and after each experiment.

The thermal stability was evaluated by TGA on a Mettler Toledo TGA/DSC Start<sup>e</sup> System under nitrogen, with a heating rate of 10 °C/min. Heating of crystalline sam

### 3. $^1\text{H}$ NMR, $^{13}\text{C}$ NMR, FT-IR and MALDI-TOF MS spectra

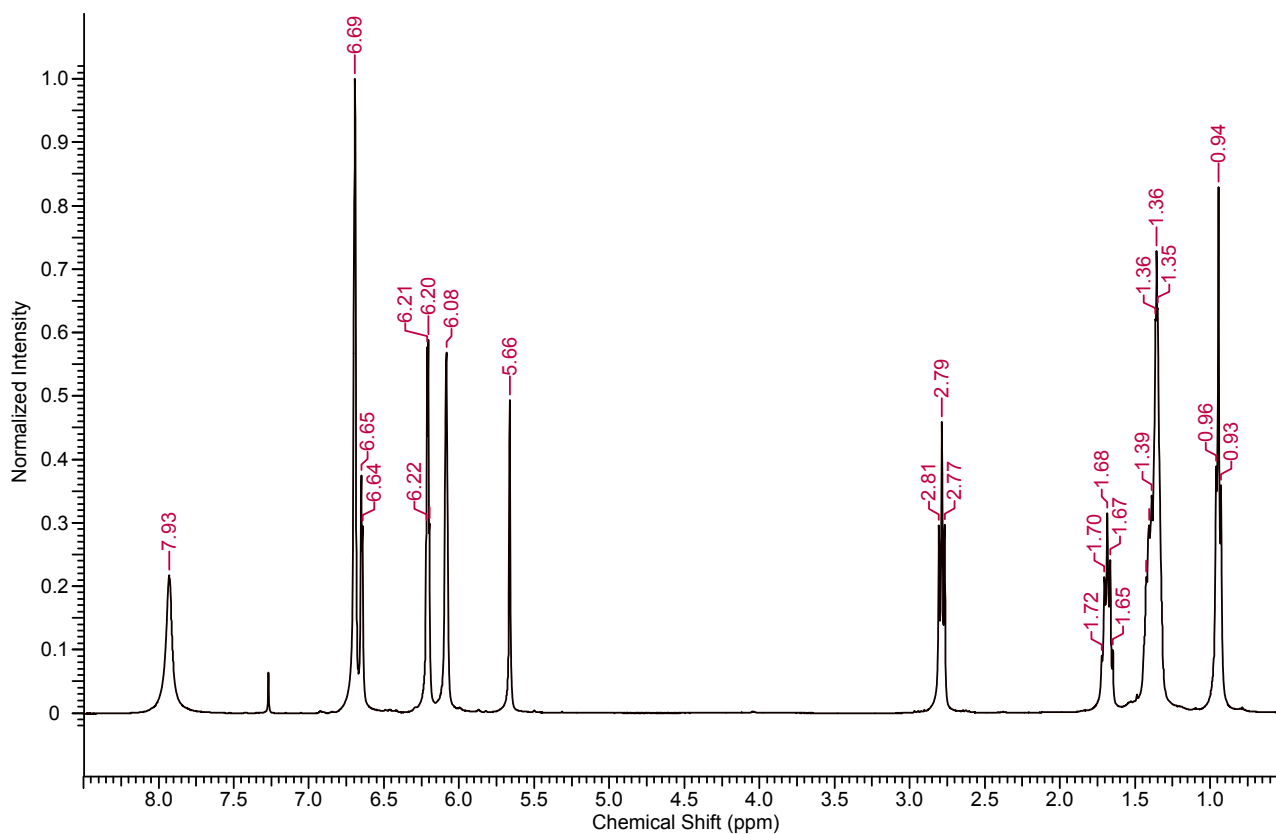

**Figure S1.**  $^1\text{H}$  NMR spectrum (400 MHz,  $\text{CDCl}_3$ ) of **3**.

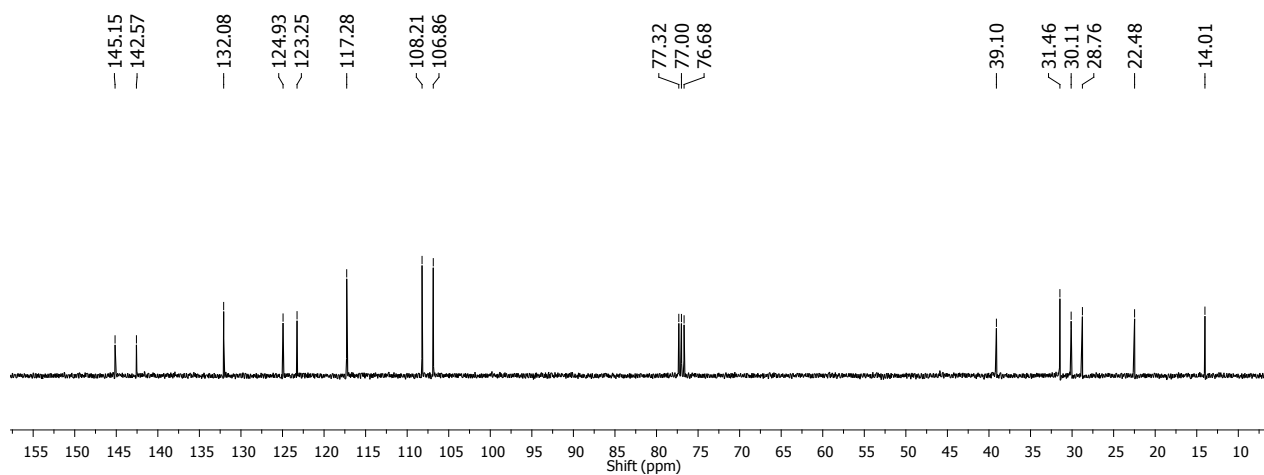

**Figure S2.**  $^{13}\text{C}$  NMR spectrum (100 MHz,  $\text{CDCl}_3$ ) of **3**.

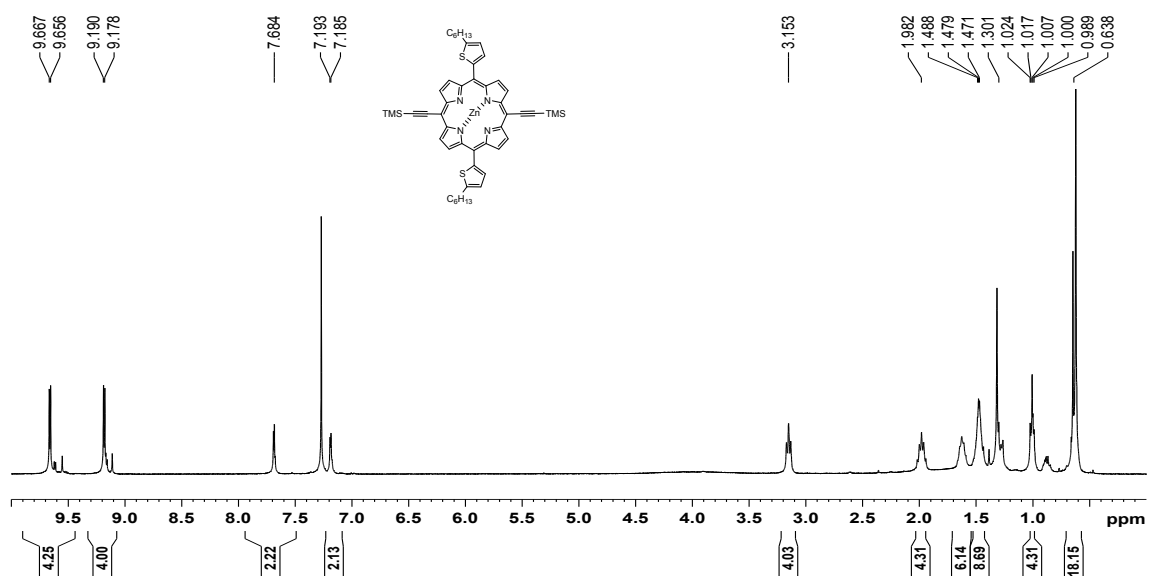

**Figure S3.**  $^1\text{H}$  NMR spectrum (400 MHz,  $\text{CDCl}_3$ ) of **6**.

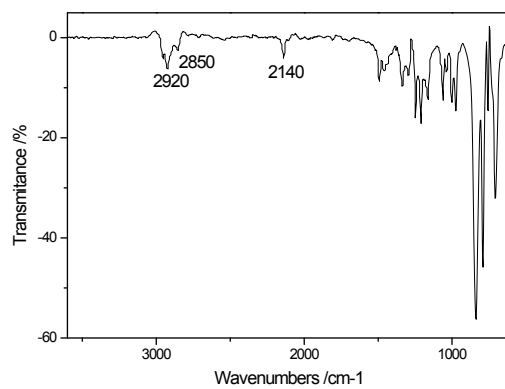

**Figure S4.** FT-IR spectrum of compound **6**.

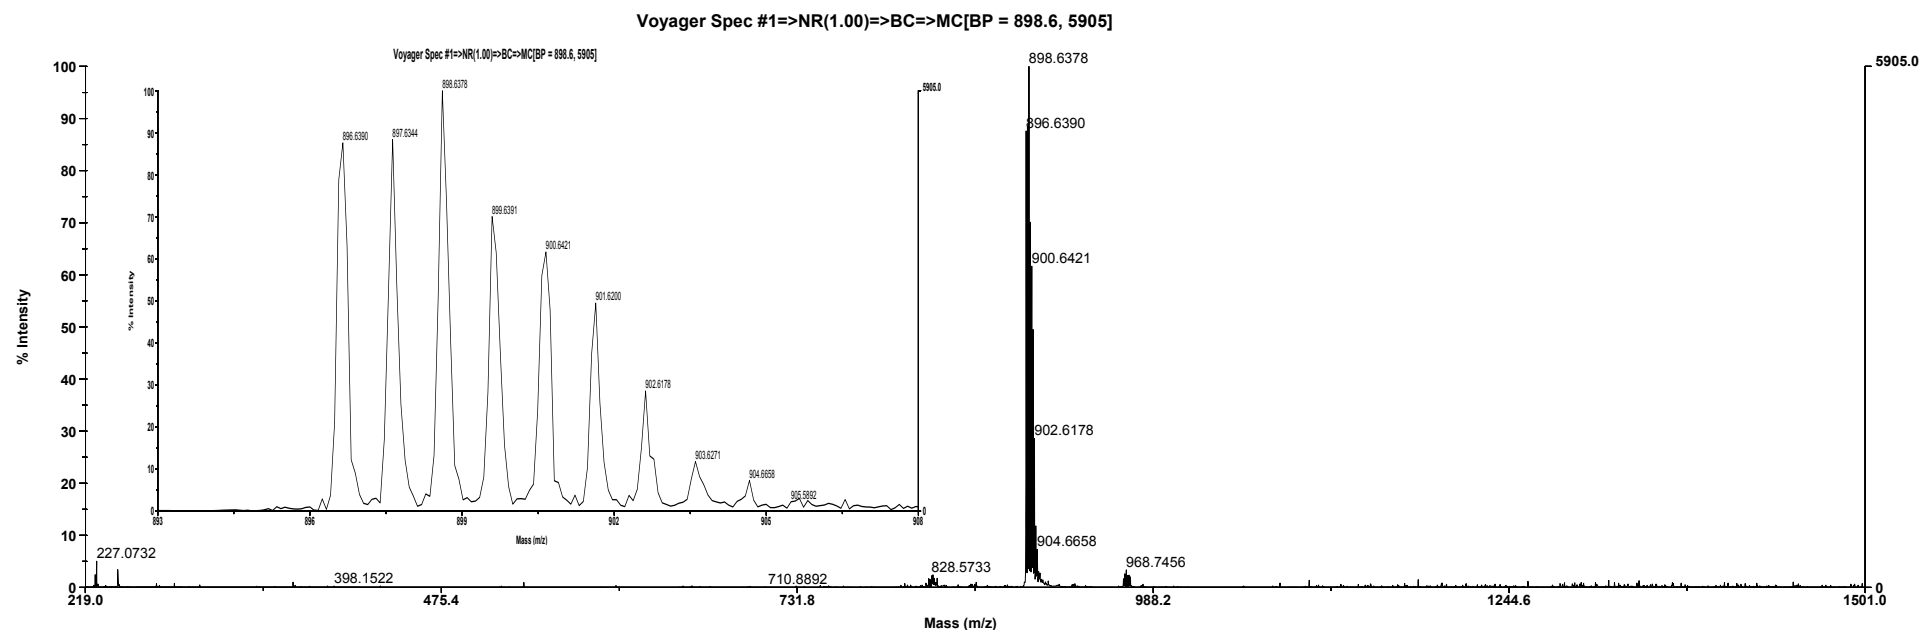

Figure S5. MALDI-TOF MS spectrum of compound **6** (Matrix: Dithranol).

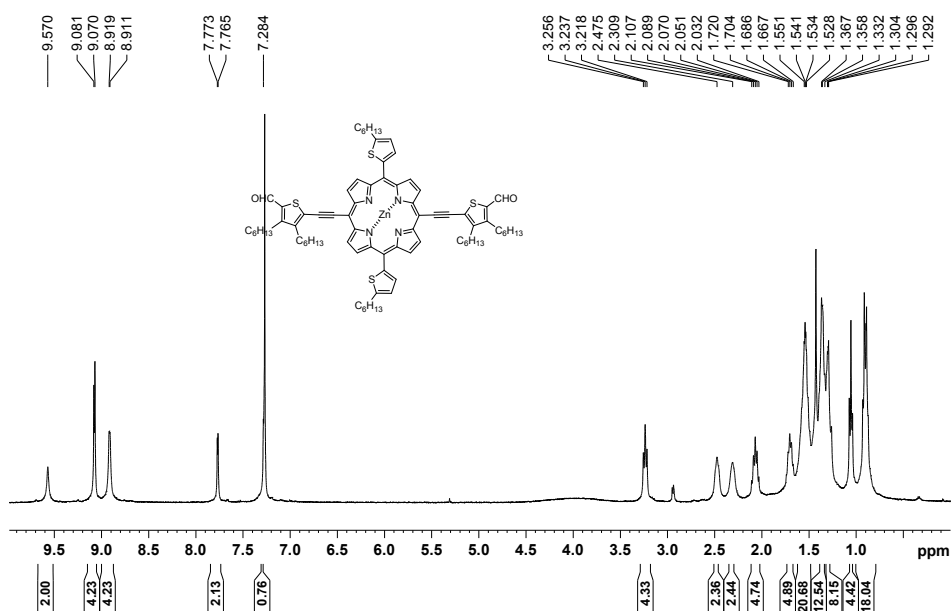

**Figure S6.**  $^1\text{H}$  NMR spectrum (400 MHz,  $\text{CDCl}_3$ ) of **8a**.

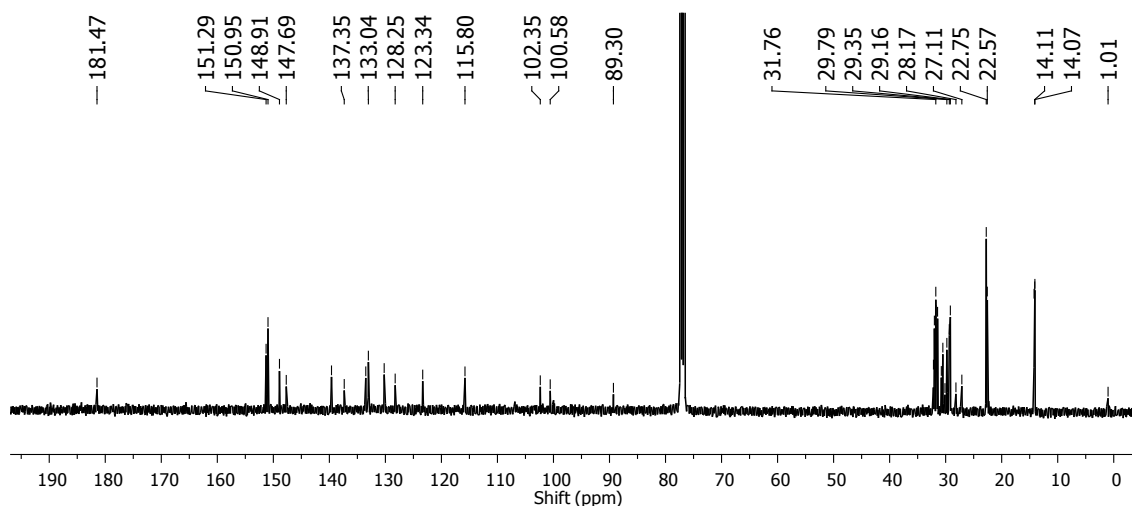

**Figure S7.**  $^{13}\text{C}$  NMR spectrum (100 MHz,  $\text{CDCl}_3$ ) of **8a**.

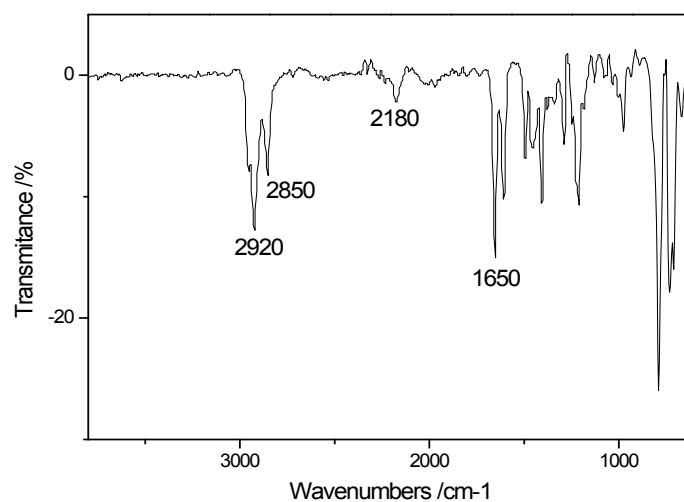

**Figure S8.** FT-IR spectrum of compound **8a**.

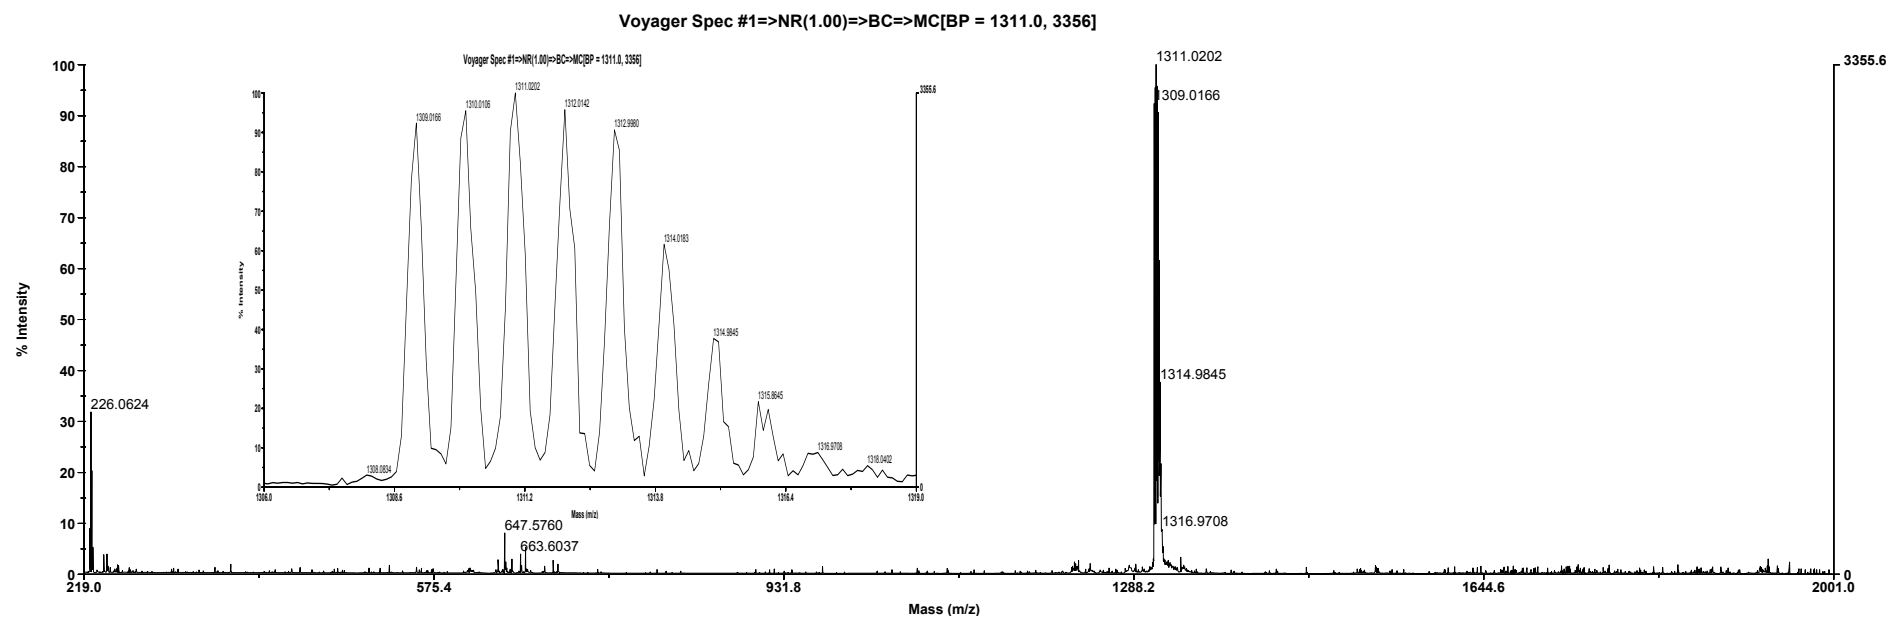

Figure S9. MALDI-TOF MS spectrum of compound **8a** (Matrix: Dithranol).

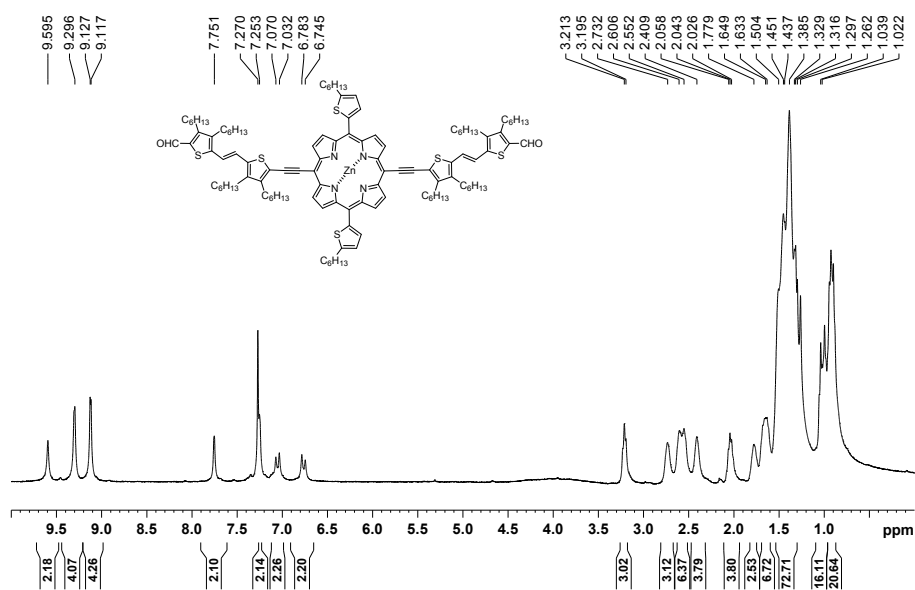

Figure S10.  $^1\text{H}$  NMR spectrum (400 MHz,  $\text{CDCl}_3$ ) of **8b**.

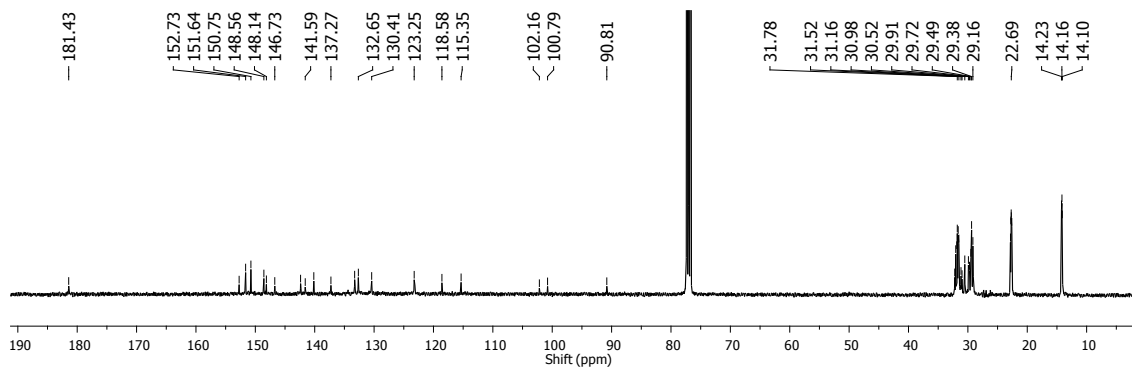

Figure S11.  $^{13}\text{C}$  NMR spectrum (100 MHz,  $\text{CDCl}_3$ ) of **8b**.

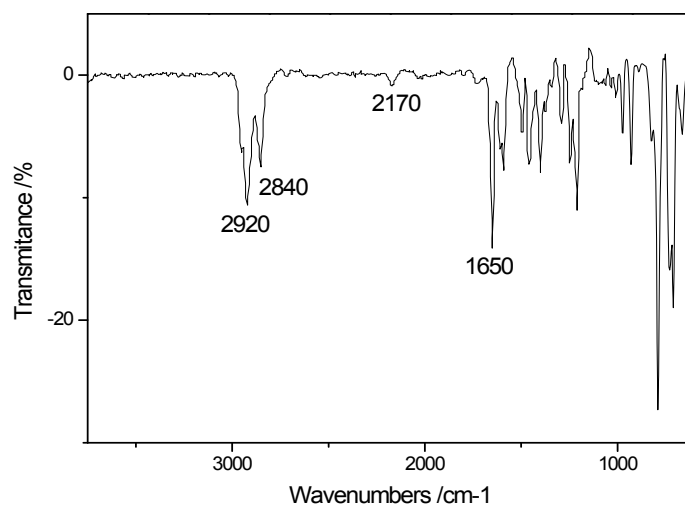

Figure S12. FT-IR spectrum of compound **8b**.



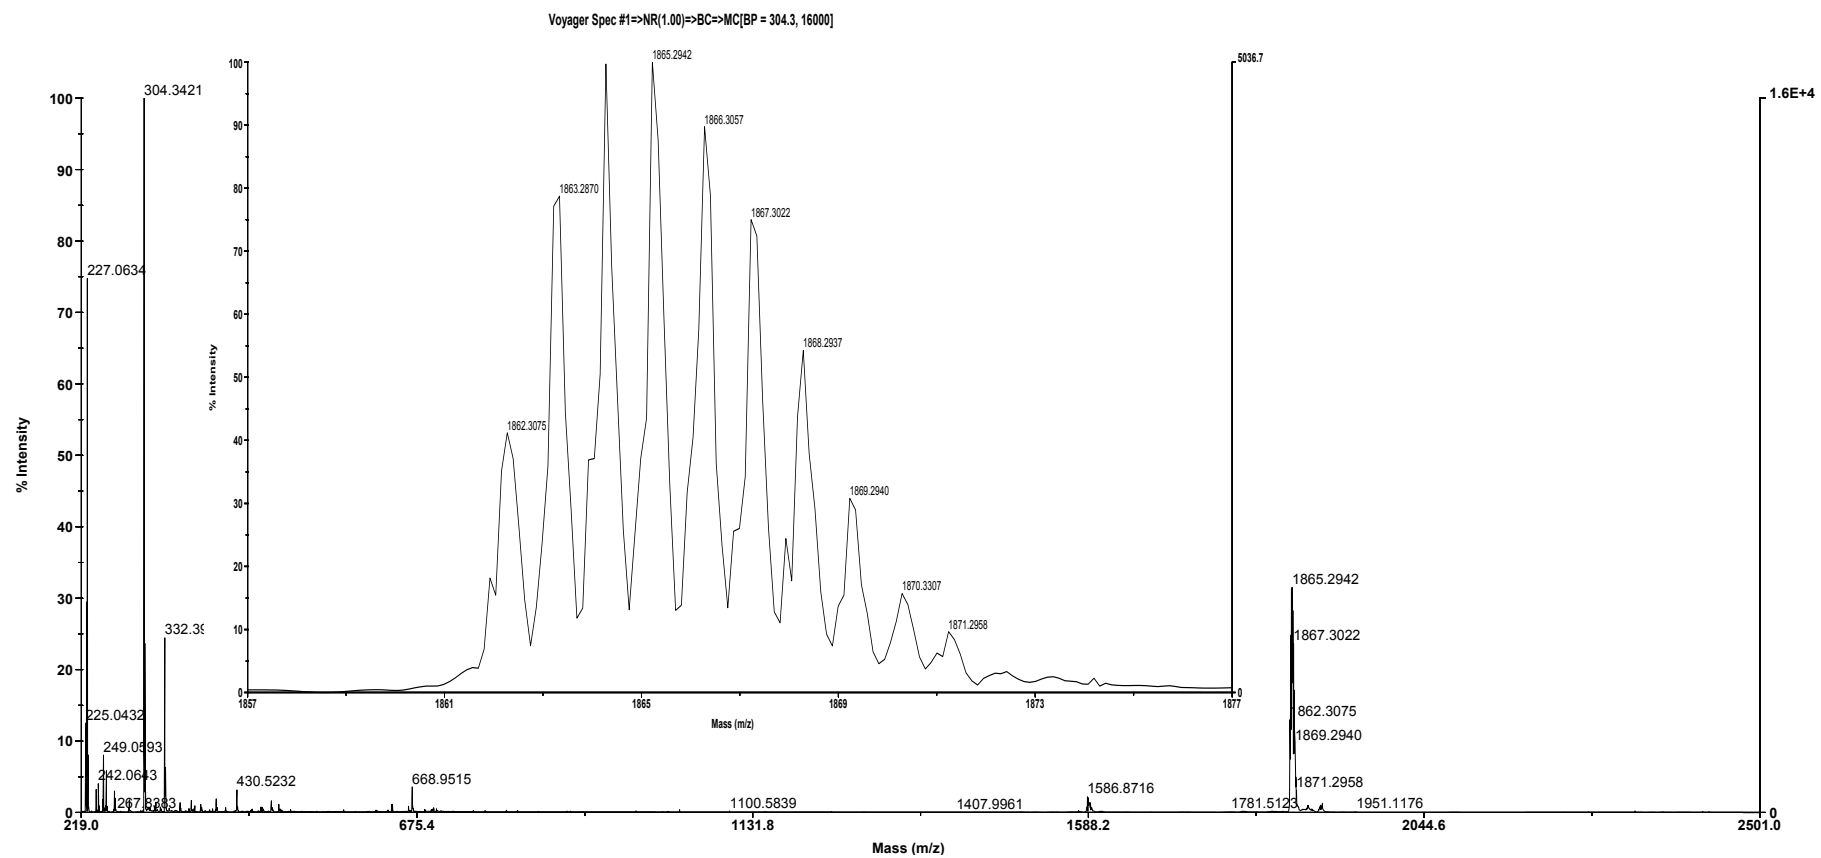

Figure S13. MALDI-TOF MS spectrum of compound **8b** (Matrix: Dithranol).

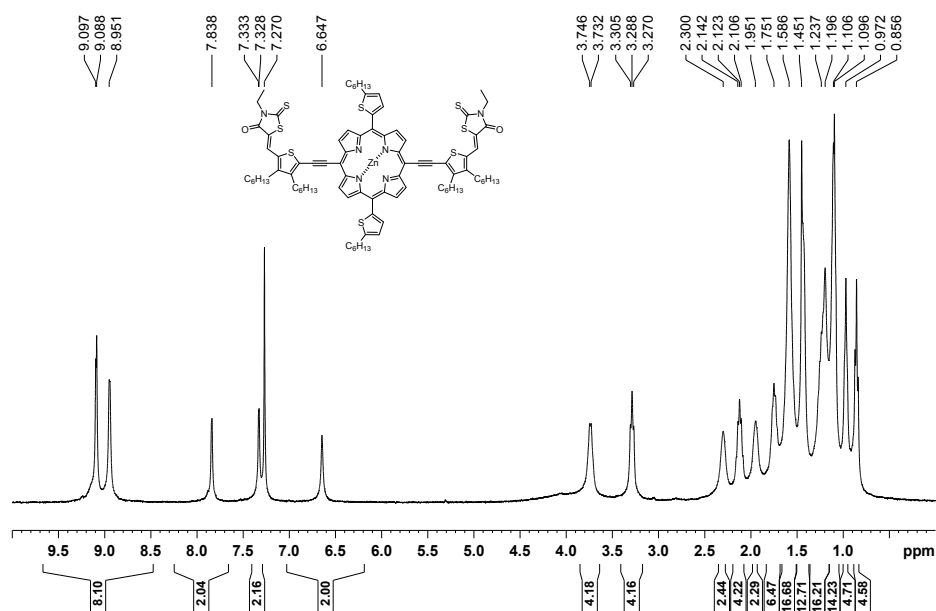

Figure S14. <sup>1</sup>H NMR spectrum (400 MHz, CDCl<sub>3</sub>) of **1a**

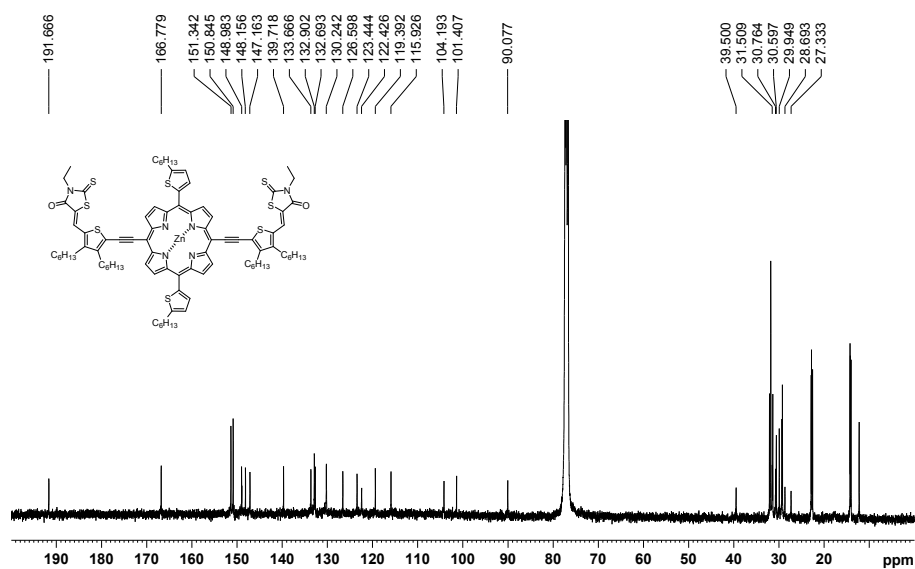

Figure S15. <sup>13</sup>C NMR spectrum (100 MHz, CDCl<sub>3</sub>) of **1a**

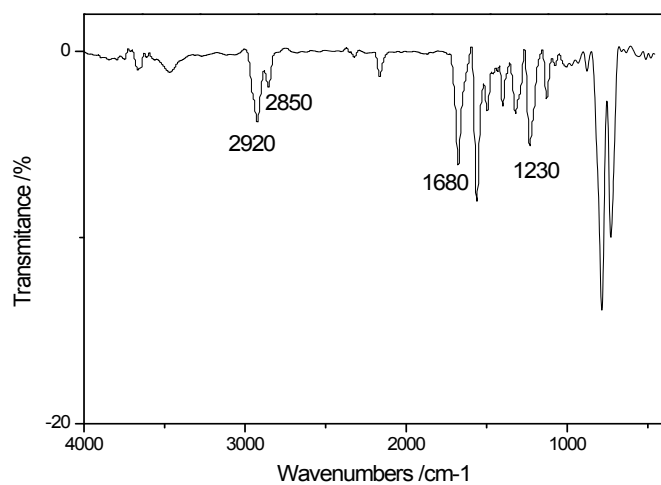

Figure S16. FT-IR spectrum of compound **1a**.

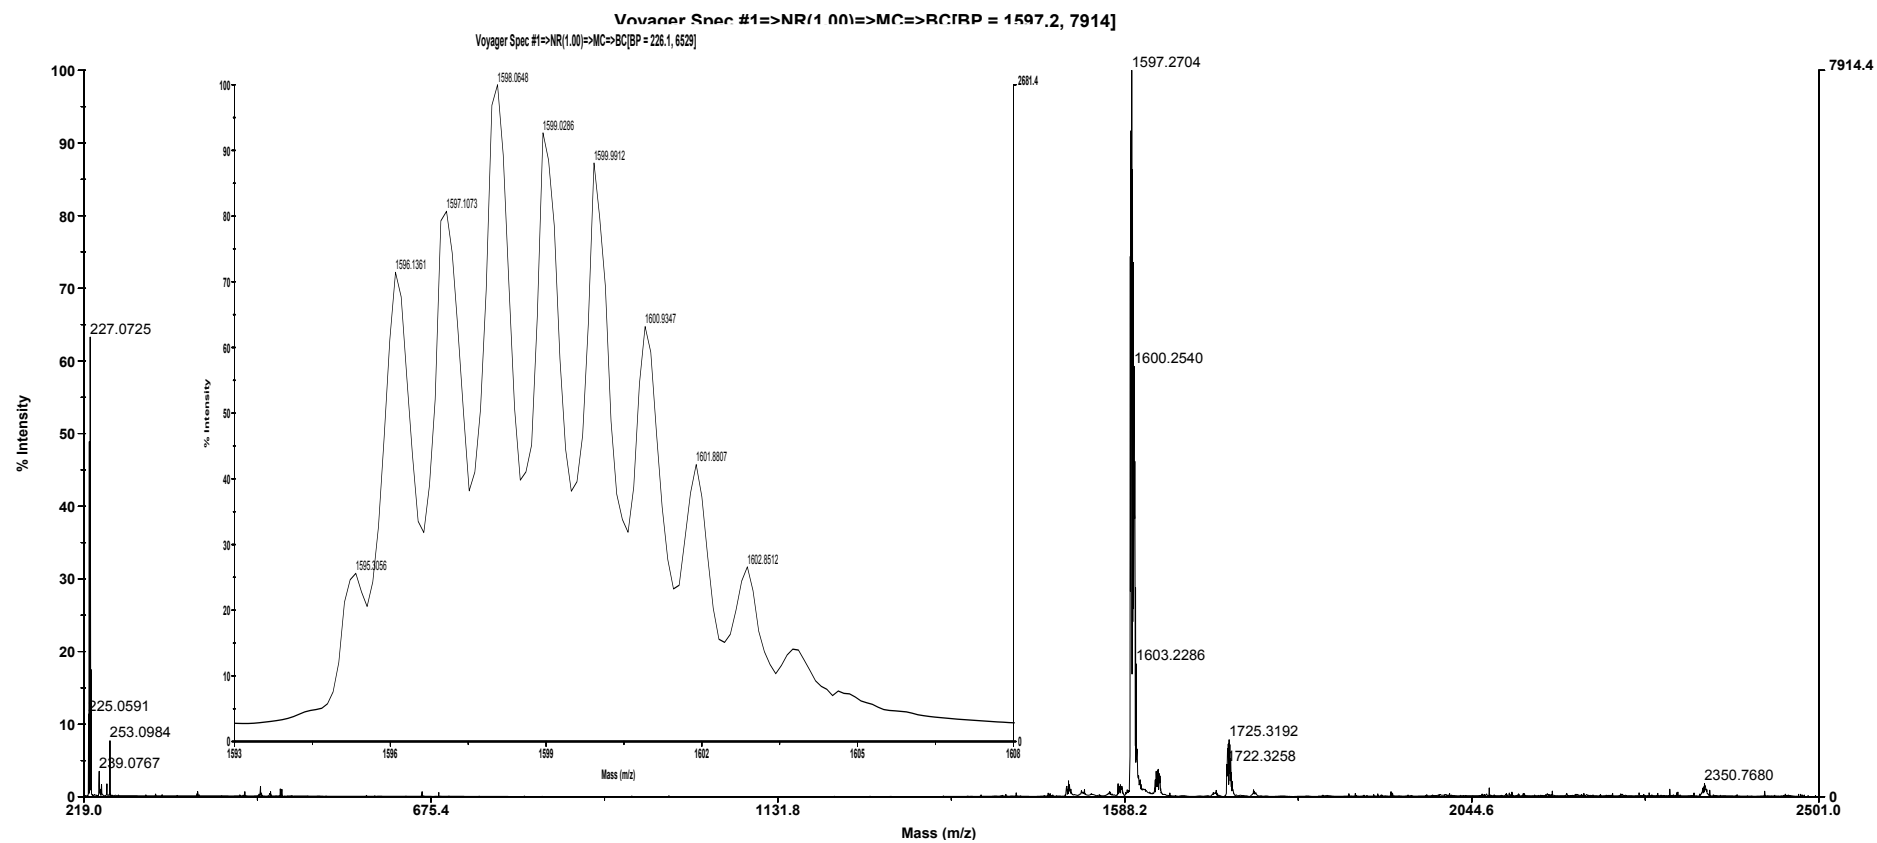

Figure S17. MALDI-TOF MS spectrum of compound **1a** (Matrix: Dithranol).

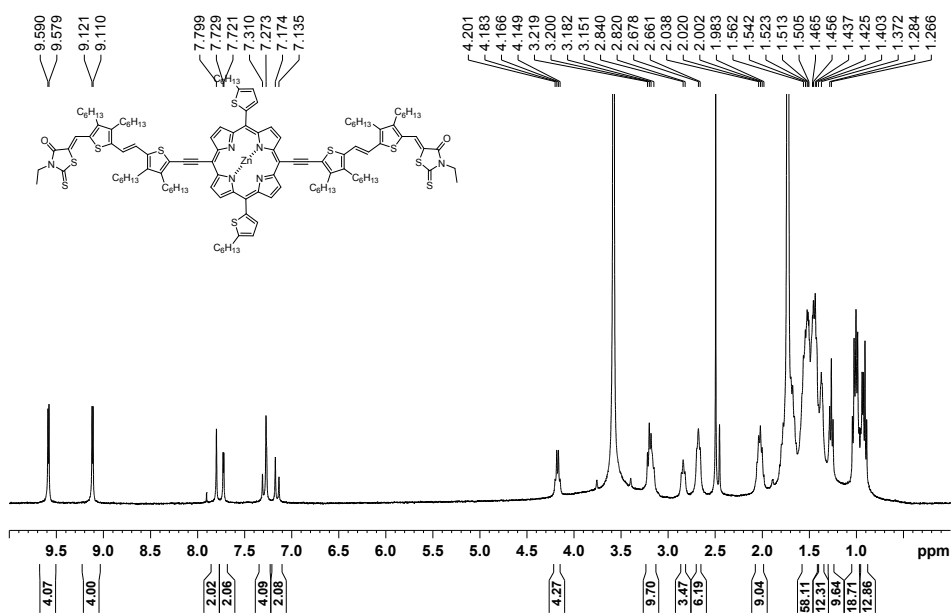

**Figure S18.**  $^1\text{H}$  NMR spectrum (400 MHz, THF-D8) of **1b**.

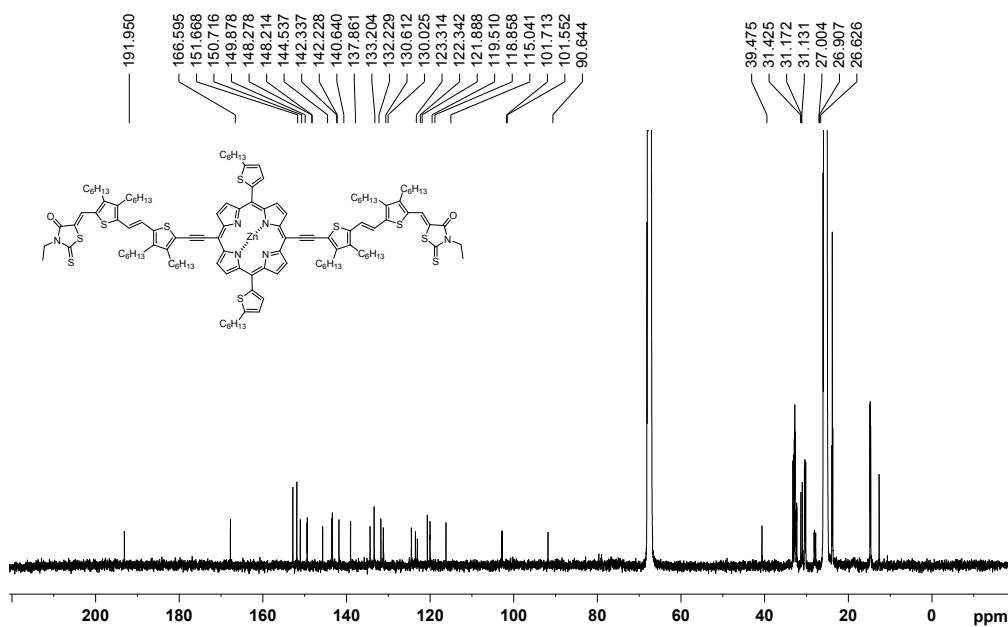

**Figure S19.**  $^{13}\text{C}$  NMR spectrum (100 MHz, THF-D8) of **1b**.

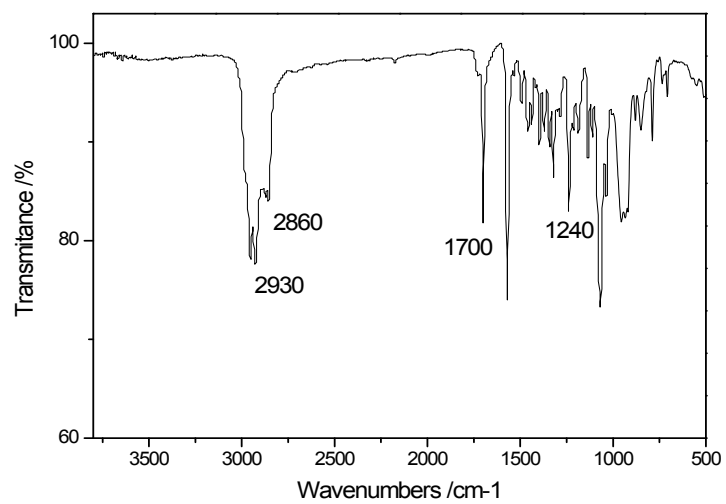

**Figure S20.** FT-IR spectrum of compound **1b**.

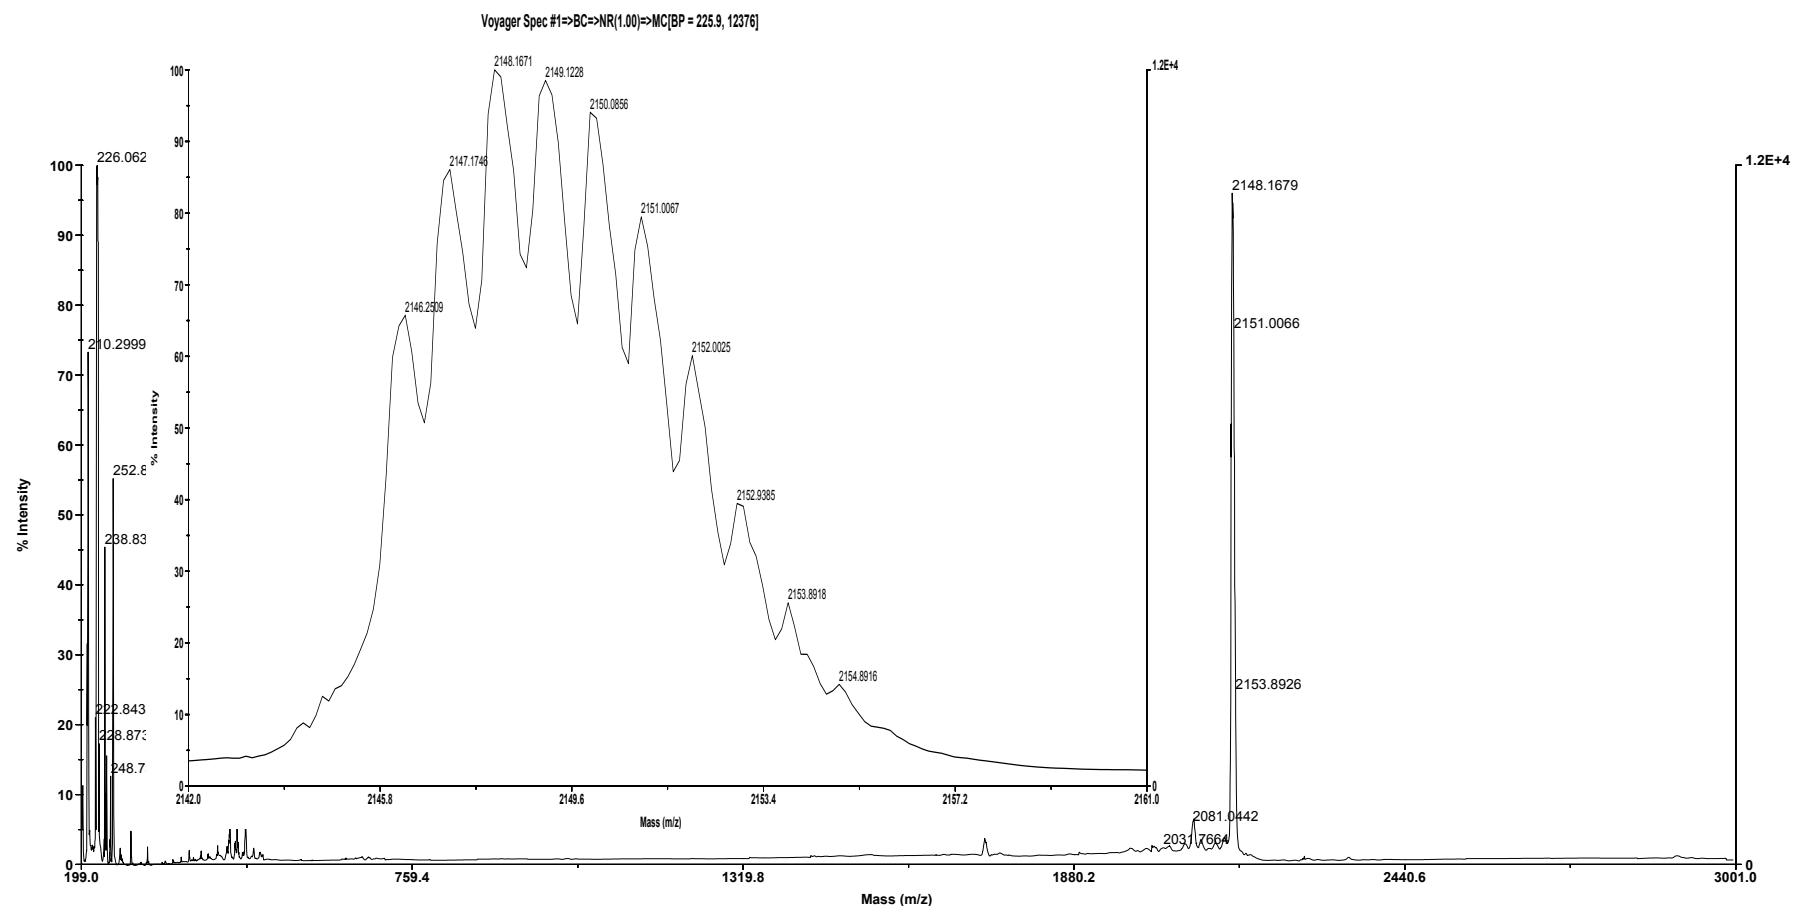

Figure S21. MALDI-TOF MS spectrum of compound **1b** (Matrix: Dithranol).

### 3. Thermogravimetric analysis

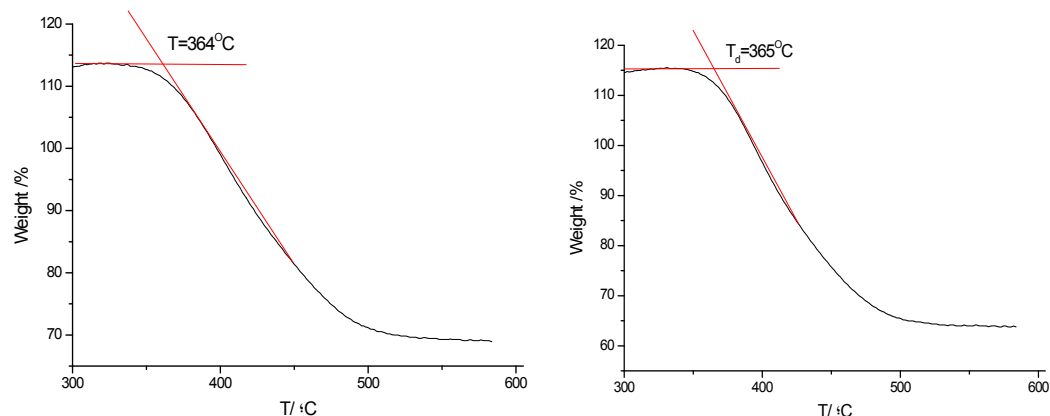

**Figure S22.** Thermogravimetric analysis of **1a** (left) and **1b** (right).

### 4. UV-Visible and emission spectroscopies

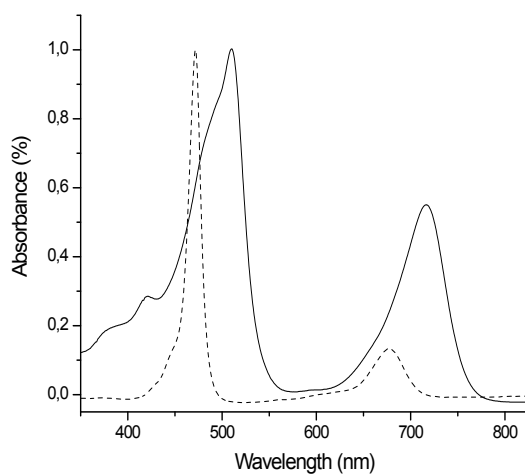

**Figure S23.** Normalized UV-Vis absorption spectra of compounds **1a** (—) and precursor **8a** (---)  $10^{-5}$  M in THF.

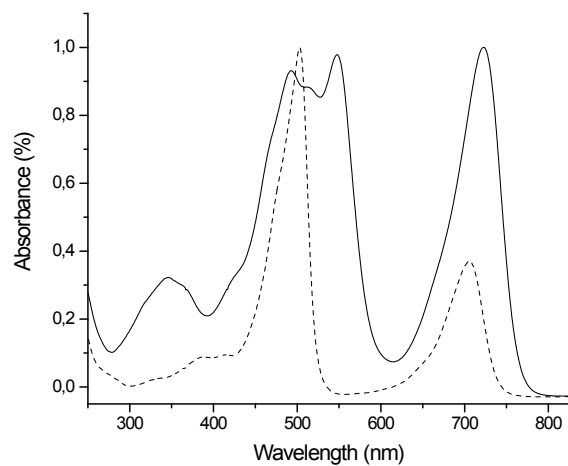

**Figure S24.** Normalized UV-Vis absorption spectra of compound **1b** (—) and precursor **8b** (---) in  $10^{-5}$  M THF.

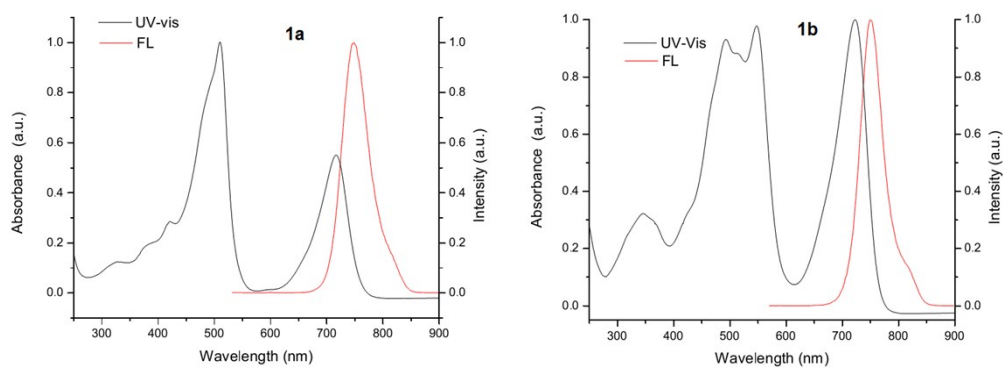

**Figure S25.** Normalized absorption and fluorescence spectra of **1a** and **1b** to estimated  $E_{0-0}$

## 5. Cyclic Voltammetry and Square Wave plots.

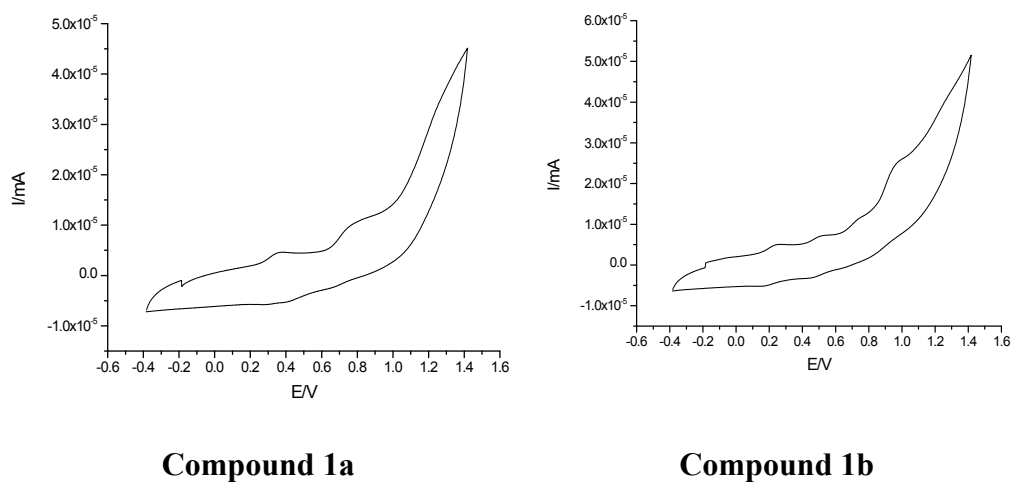

**Figure S26.** Cyclic Voltammetry of compound **1a** and **1b** (referred to Fc/Fc<sup>+</sup>).

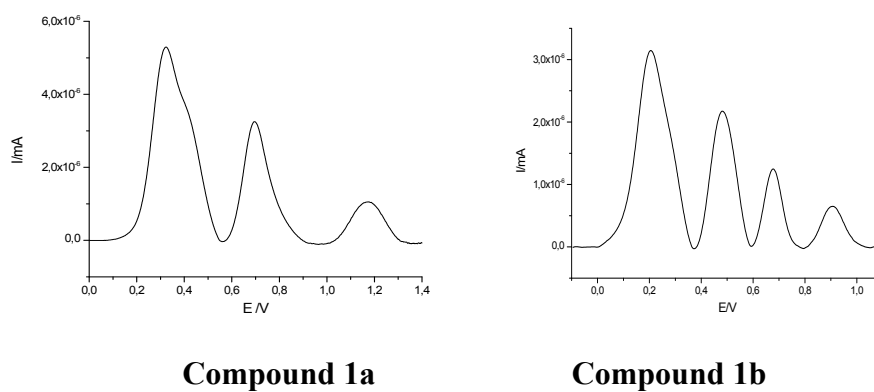

**Figure S27.** OSWV of **1a** and **1b** (anodic window) (referred to Fc/Fc<sup>+</sup>).
